# Supplementary material
Source: publisher site journal article supplement (https://www.dovepress.com/article/212352)
Supplement: Supplementary file 1 [file get_supplementary_file.php]

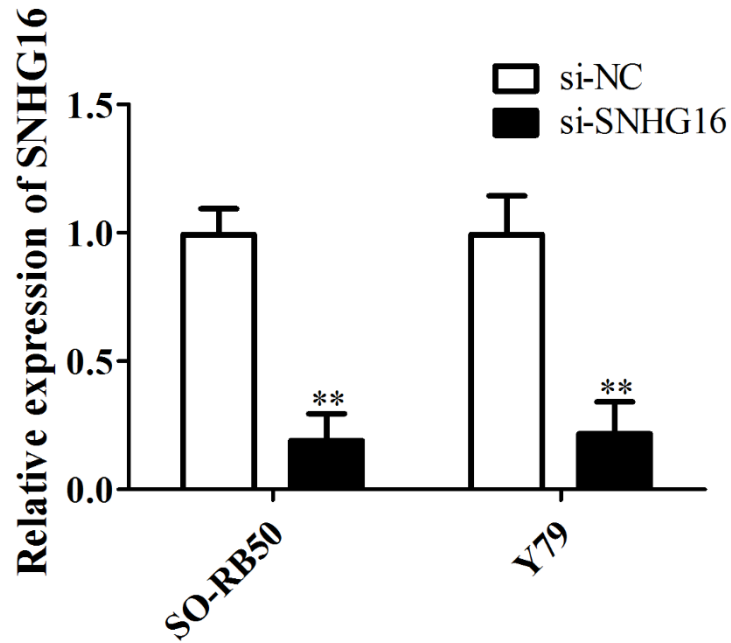

**Supplementary Figure 1. qRT-PCR analysis of SNHG16 levels in RB50 and Y79 cells.** RB50 and Y79 cells were transfected si-SNHG16 or si-NC and relative SNHG16 expression was assessed using qRT-PCR. \*\* $p < 0.01$  compared with the control group.

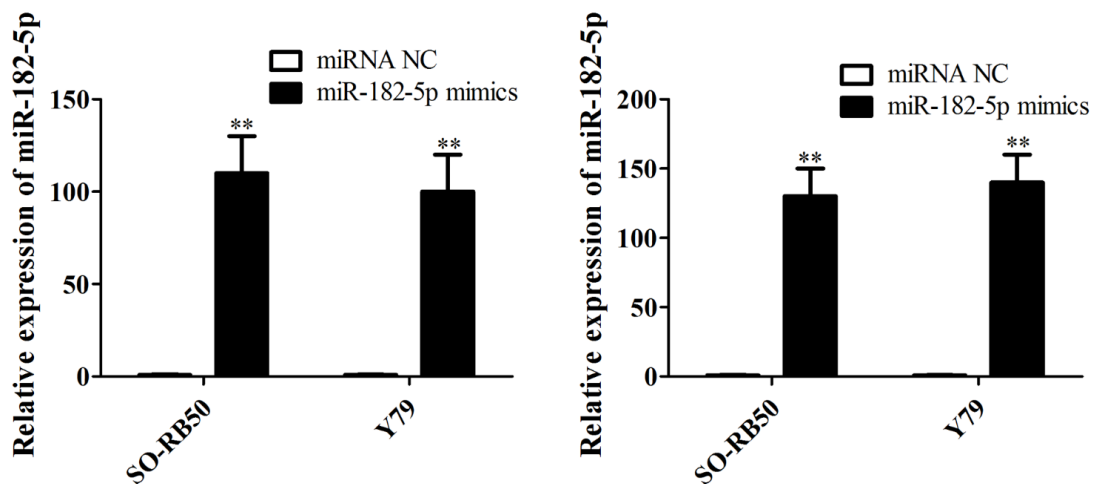

**Supplementary Figure 2. miR-182-5p and miR-128-3p levels was validated using qRT-PCR.** RB50 and Y79 cells were transfected miR-182-5p mimics, miR-128-3p mimics or miRNA negative and relative miRNA expression was determined using qRT-PCR. \*\* $p < 0.01$  compared with the control group.
